# Supplementary material for: Persistent COVID-19 Symptoms Minimally Impact the Development of SARS-CoV-2-Specific T Cell Immunity
Source: MDPI journal article supplement (doi:10.3390/v13050916), 2021-05-15
Supplement: s1 [file s1]

Subject #1

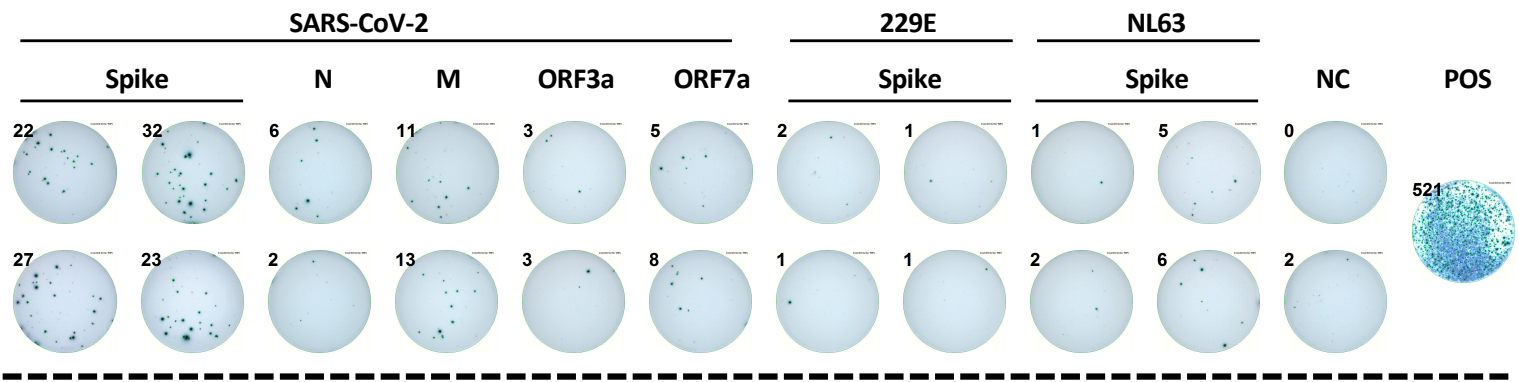

Subject #2

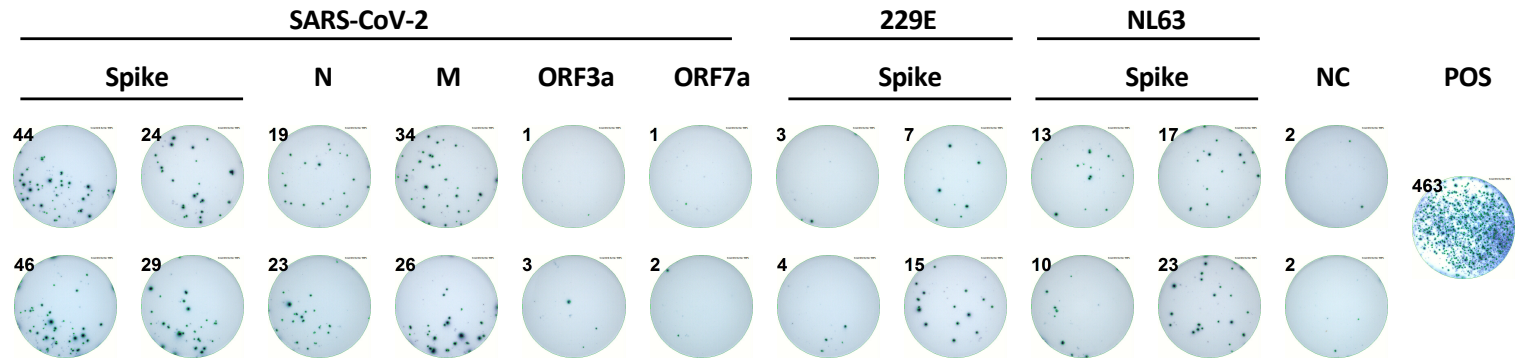

Figure S1. Representative IFN-γ ELISPOT plate images

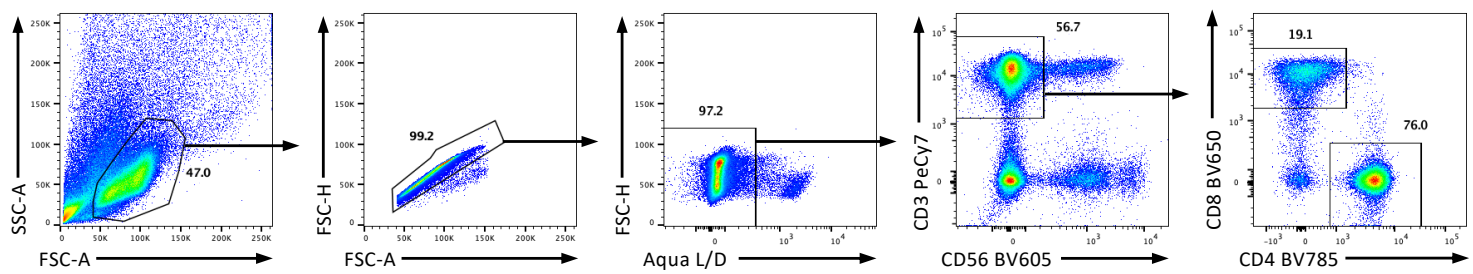

**Figures S2.** Gating scheme for activated CD4 and CD8 T cell isolation

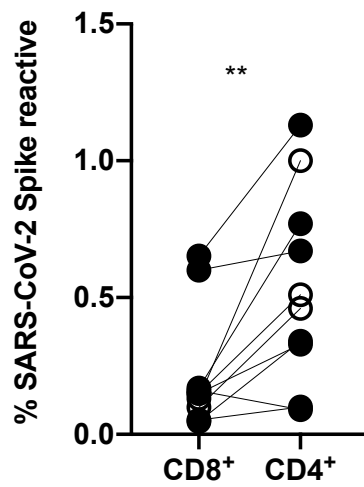

**Figure S3.** Background-subtracted frequency of SARS-CoV-2 Spike reactive CD8+ and CD4+ T cells in 10 select convalescent COVID-19 patients. \*\*  $p < 0.01$  two-tailed paired T test.

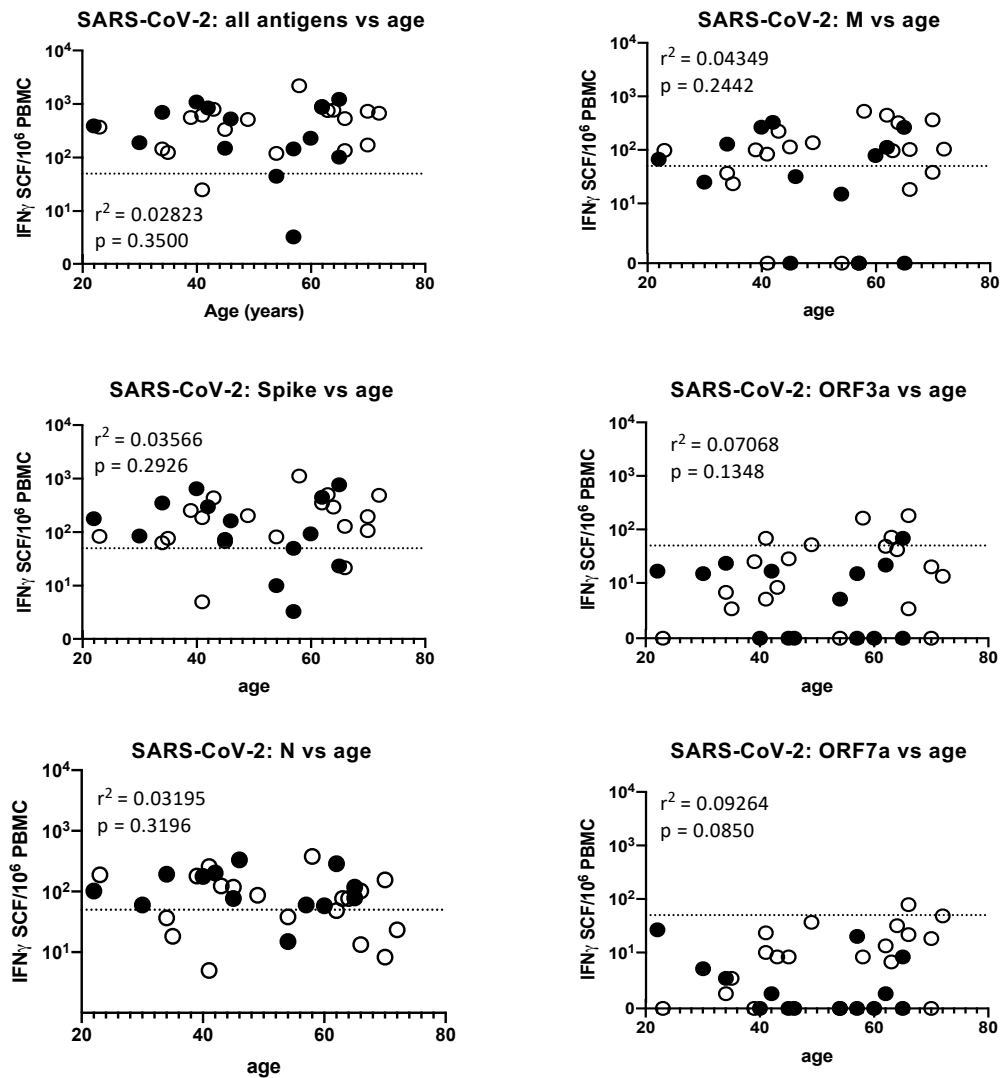

**Figure S4.** Relationship between age and SARS-CoV-2 antigen reactivity as assessed by IFN-γ ELISPOT. Pearson correlation calculations were used to determine r<sup>2</sup> and two-tailed p values. Dashed line indicates the 50 IFN-γ SFC/10<sup>6</sup> PBMC threshold for positivity
