# Supplementary material for: Persistent COVID-19 Symptoms Minimally Impact the Development of SARS-CoV-2-Specific T Cell Immunity
Source: MDPI journal article supplement (doi:10.3390/v13050916), 2021-05-15
Supplement: s1 [file s1]

**Table S1.** Peptide pools used for IFN- $\gamma$  ELISPOT analysis

| <b>Virus</b> | <b>Antigen</b>             | <b>Company</b>           | <b>Product #</b> |
|--------------|----------------------------|--------------------------|------------------|
| SARS-CoV-2   | Spike glycoprotein         | JPT Peptide Technologies | PM-WCPV-S        |
| SARS-CoV-2   | Nucleoprotein peptide pool | JPT Peptide Technologies | PM-WCPV-NCAP     |
| SARS-CoV-2   | Membrane peptide pool      | JPT Peptide Technologies | PM-WCPV-VME      |
| SARS-CoV-2   | ORF3A peptide pool         | JPT Peptide Technologies | PM-WCPV-AP3A     |
| SARS-CoV-2   | ORF7A peptide pool         | JPT Peptide Technologies | PM-WCPV-NS7A     |
| HCoV-229E    | Spike glycoprotein         | JPT Peptide Technologies | PM-229E-S-1      |
| HCoV-NL63    | Spike glycoprotein         | JPT Peptide Technologies | PM-NL63-S-1      |

**Table S2.** Antibody used for flow cytometry

| <b>Antibody</b> | <b>Clone</b> | <b>Manufacturer</b> | <b>Catalog #</b> | <b>Lot #</b> | <b>Dilution used</b> |
|-----------------|--------------|---------------------|------------------|--------------|----------------------|
| CD25 PE         | BC69         | Biolegend           | 302606           | B296102      | 1:160                |
| CD3 PeCy7       | HIT3a        | Biolegend           | 300316           | B293468      | 1:320                |
| CD69 AF647      | FN50         | Biolegend           | 310918           | B275384      | 1:160                |
| CD134 FITC      | Act36        | Biolegend           | 350006           | B296280      | 1:160                |
| CD56 BV605      | 5.1H11       | Biolegend           | 362537           | B320741      | 1:160                |
| CD8 BV650       | RPA-T8       | Biolegend           | 301041           | B275821      | 1:320                |
| CD4 BV785       | RPA-T4       | Biolegend           | 300553           | B298451      | 1:160                |

**Table S3.** RNAseq metrics

| <b>Sample ID</b> | <b>Duration of symptoms (days)</b> | <b>Number of sorted cells</b> | <b>RNA recovery</b> | <b># aligned reads</b> |
|------------------|------------------------------------|-------------------------------|---------------------|------------------------|
| Short #1         | 2                                  | 3,179                         | 2,370pg             | 45.6M                  |
| Short #2         | 5                                  | 4,536                         | 3,255pg             | 47.0M                  |
| Short #3         | 3                                  | 648                           | 496pg               | 43.6M                  |
| Short #4         | 5                                  | 1,318                         | 1,170pg             | 48.1M                  |
| Short #5         | 7                                  | 4,076                         | 2,325pg             | 46.0M                  |
| Long #1          | 19                                 | 2,214                         | 1,095pg             | 45.1M                  |
| Long #2          | 18                                 | 1,586                         | 765pg               | 45.2M                  |
| Long #3          | 33                                 | 4,497                         | 2,025pg             | 49.6M                  |
| Long #4          | 61                                 | 1,061                         | 1,155pg             | 46.6M                  |
| Long #5          | 37                                 | 106                           | 690pg               | 45.0M                  |
